# Supplementary material
Source: PubMed Central journal article supplement (PMC6157603)
Supplement: NIHMS539978-supplement-supplement_1.pdf [file NIHMS539978-supplement-supplement_1.pdf]

**Table S 1. Number of risk factors within each age group**

| Age (years)  | Total number of risk factors |            |            |            |            | Total      | Mean number<br>of risk factors |
|--------------|------------------------------|------------|------------|------------|------------|------------|--------------------------------|
|              | 0                            | 1          | 2          | 3          | 4-5        |            |                                |
| <b>Men</b>   |                              |            |            |            |            |            |                                |
| 15-44, n (%) | 4 (14.3)                     | 8 (28.6)   | 10 (35.7)  | 4 (14.3)   | 2 (7.1)    | 28 (100)   | 1.7                            |
| 45-54, n (%) | 10 (12.5)                    | 19 (23.8)  | 26 (32.5)  | 21 (26.2)  | 4 (5.0)    | 80 (100)   | 1.9                            |
| 55-64, n (%) | 11 (4.0)                     | 58 (20.9)  | 86 (30.9)  | 91 (32.7)  | 32 (11.5)  | 278 (100)  | 2.3                            |
| 65-74, n (%) | 19 (5.1)                     | 58 (15.6)  | 133 (35.8) | 104 (28.0) | 58 (15.6)  | 372 (100)  | 2.3                            |
| 75-84, n (%) | 17 (4.1)                     | 81 (19.8)  | 154 (37.6) | 130 (31.7) | 28 (6.8)   | 410 (100)  | 2.2                            |
| 85-, n (%)   | 7 (4.6)                      | 49 (32.0)  | 48 (31.4)  | 37 (24.2)  | 12 (7.8)   | 153 (100)  | 2.0                            |
| Total, n (%) | 68 (5.1)                     | 273 (20.7) | 457 (34.6) | 387 (29.3) | 136 (10.3) | 1321 (100) | 2.2                            |
| <b>Women</b> |                              |            |            |            |            |            |                                |
| 15-44, n (%) | 5 (27.8)                     | 6 (33.3)   | 4 (22.2)   | 2 (11.1)   | 1 (5.6)    | 18 (100)   | 1.3                            |
| 45-54, n (%) | 5 (11.4)                     | 17 (38.6)  | 15 (34.1)  | 4 (9.1)    | 3 (6.8)    | 44 (100)   | 1.6                            |
| 55-64, n (%) | 1 (1.0)                      | 24 (23.3)  | 38 (36.9)  | 32 (31.1)  | 8 (7.8)    | 103 (100)  | 2.2                            |
| 65-74, n (%) | 5 (2.0)                      | 44 (17.8)  | 84 (34.0)  | 88 (35.6)  | 26 (10.5)  | 247 (100)  | 2.4                            |

|              |          |            |            |            |           |            |     |
|--------------|----------|------------|------------|------------|-----------|------------|-----|
| 75-84, n (%) | 15 (3.6) | 70 (16.7)  | 161 (38.3) | 128 (30.5) | 46 (11.0) | 420 (100)  | 2.3 |
| 85-, n (%)   | 13 (3.7) | 71 (20.2)  | 143 (40.6) | 110 (31.2) | 15 (4.3)  | 352 (100)  | 2.1 |
| Total, n (%) | 44 (3.7) | 232 (19.6) | 445 (37.6) | 364 (30.7) | 99 (8.4)  | 1184 (100) | 2.2 |

---

There was no significant difference in risk factor burden between the sexes in any age group.

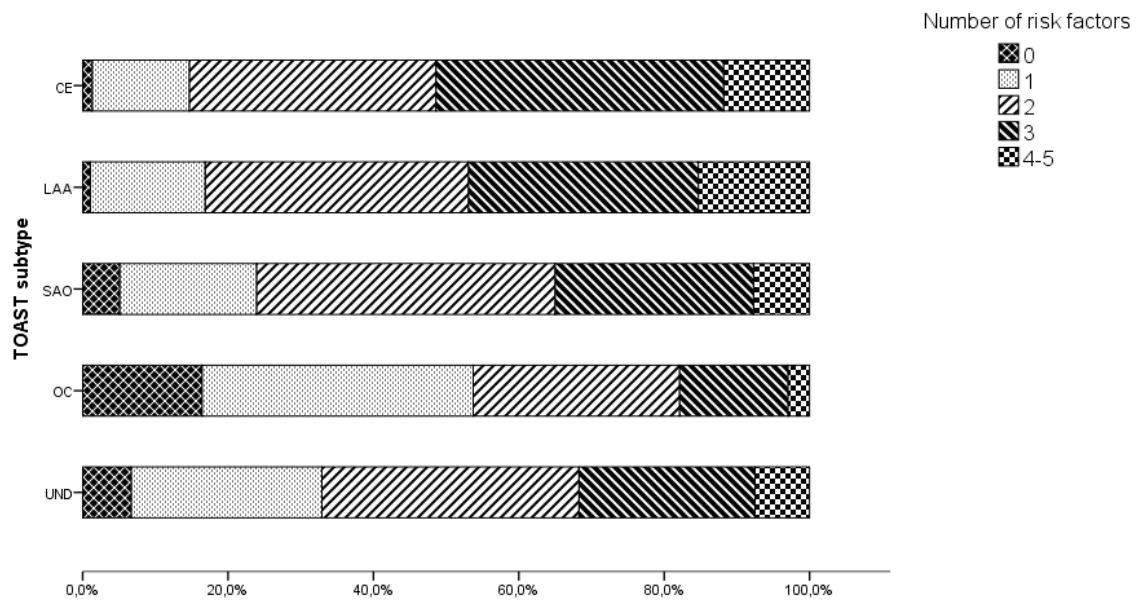

---

**Figure S 1. Proportions of number of risk factors among the pathogenetic stroke subtypes**

CE (cardioembolism), LAA (large artery atherosclerosis, SAO (small artery occlusion), OC (other causes), UND (stroke of undetermined cause).
